# Supplementary material for: Baicalin administration attenuates hyperglycemia-induced malformation of cardiovascular system
Source: PubMed Central journal article supplement (PMC5833405; doi:10.1038/s41419-018-0318-2), 2018-02-14
Supplement: 41419_2018_318_MOESM4_ESM.pdf [file 41419_2018_318_MOESM4_ESM.pdf]

## Supplementary Results

### Fig. 1:

**B1:** Control:  $0.58 \pm 0.05\text{mm}$ ;  $3\mu\text{M}$  baicalin:  $0.57 \pm 0.07\text{mm}$ ;  $6\mu\text{M}$  baicalin:  $0.59 \pm 0.04\text{mm}$ ;  $12\mu\text{M}$  baicalin:  $0.48 \pm 0.04\text{mm}$ ;  $24\mu\text{M}$  baicalin:  $0.39 \pm 0.04\text{mm}$ .  $N > 6$  embryos in each group.

**B2:** Control:  $4.06 \pm 0.13\text{mm}$ ;  $3\mu\text{M}$  baicalin:  $4.02 \pm 0.18\text{mm}$ ;  $6\mu\text{M}$  baicalin:  $3.95 \pm 0.29\text{mm}$ ;  $12\mu\text{M}$  baicalin:  $3.47 \pm 0.29\text{mm}$ ;  $24\mu\text{M}$  baicalin:  $3.08 \pm 0.38\text{mm}$ .  $N > 6$  embryos in each group.

**B3:** Control:  $4.28 \pm 0.09\text{mm}$ ;  $3\mu\text{M}$  baicalin:  $4.15 \pm 0.16\text{mm}$ ;  $6\mu\text{M}$  baicalin:  $4.27 \pm 0.09\text{mm}$ ;  $12\mu\text{M}$  baicalin:  $3.60 \pm 0.29\text{mm}$ ;  $24\mu\text{M}$  baicalin:  $3.79 \pm 0.16\text{mm}$ .  $N > 6$  embryos in each group.

**B4:** Control:  $13.80 \pm 0.60$ ;  $3\mu\text{M}$  baicalin:  $14.00 \pm 0.77$ ;  $6\mu\text{M}$  baicalin:  $13.60 \pm 0.67$ ;  $12\mu\text{M}$  baicalin:  $10.90 \pm 1.70$ ;  $24\mu\text{M}$  baicalin:  $9.20 \pm 1.47$ .  $N > 6$  embryos in each group.

**C1:** Control: 0%;  $3\mu\text{M}$  baicalin: 0%;  $6\mu\text{M}$  baicalin: 0%;  $12\mu\text{M}$  baicalin: 33%;  $24\mu\text{M}$  baicalin: 50%.  $N > 6$  embryos in each group.

### Fig. 2:

**A1:** Control:  $0.58 \pm 0.05\text{mm}$ ;  $0\mu\text{M}$  baicalin +  $50\text{mM}$  glucose:  $0.38 \pm 0.44\text{mm}$ ;  $3\mu\text{M}$  baicalin +  $50\text{mM}$  glucose:  $0.48 \pm 0.04\text{mm}$ ;  $6\mu\text{M}$  baicalin +  $50\text{mM}$  glucose:  $0.46 \pm 0.07\text{mm}$ .  $N > 6$  embryos in each group.

**A2:** Control:  $4.06 \pm 0.13\text{mm}$ ;  $0\mu\text{M}$ :  $3.30 \pm 0.35\text{mm}$ ;  $3\mu\text{M}$ :  $3.52 \pm 0.20\text{mm}$ ;  $6\mu\text{M}$ :  $3.95 \pm 0.08\text{mm}$ .  $N > 6$  embryos in each group.

**A3:** Control:  $4.28 \pm 0.09\text{mm}$ ;  $0\mu\text{M}$ :  $3.35 \pm 0.17\text{mm}$ ;  $3\mu\text{M}$ :  $3.79 \pm 0.25\text{mm}$ ;  $6\mu\text{M}$ :  $4.26 \pm 0.16\text{mm}$ .  $N > 6$  embryos in each group.

**A4:** Control:  $13.80 \pm 0.60$ ;  $0\mu\text{M}$ :  $9.20 \pm 1.17$ ;  $3\mu\text{M}$ :  $10.00 \pm 1.41$ ;  $6\mu\text{M}$ :  $12.90 \pm 0.70$ .  $N > 6$  embryos in each group.

**B:** Control: 0%; HG+ $0\mu\text{M}$  baicalin: 50%; HG+ $3\mu\text{M}$  baicalin: 50%; HG+ $6\mu\text{M}$  baicalin: 20%.  $N > 6$  embryos in each group.

**Fig. 3:**

**E:** Heart tube malformation: Control: 0%; Baicalin: 0%; HG: 32%; HG+Baicalin: 16%.  $N = 25$  in each group.

**F1:** VMHC/PPIA: Control:  $0.33 \pm 0.0280$ ; Baicalin:  $0.30 \pm 0.0293$ ; HG:  $0.24 \pm 0.0147$ ; HG+Baicalin:  $0.36 \pm 0.0187$ .  $N > 3$ .

N-Cadherin / PPIA: Control:  $0.36 \pm 0.0288$ ; Baicalin:  $0.34 \pm 0.0089$ ; HG:  $0.15 \pm 0.0155$ ; HG+Baicalin:  $0.25 \pm 0.0391$ .  $N > 3$ .

BMP2 / PPIA: Control:  $1.02 \pm 0.0177$ ; Baicalin:  $0.95 \pm 0.0728$ ; HG:  $0.50 \pm 0.0469$ ; HG+Baicalin:  $0.69 \pm 0.0390$ .  $N > 3$ .

Wnt3a / PPIA: Control:  $0.22 \pm 0.0683$ ; Baicalin:  $0.14 \pm 0.0243$ ; HG:  $0.05 \pm 0.0144$ ; HG+Baicalin:  $0.12 \pm 0.0298$ .  $N > 3$ .

**G:** GATA4/ $\beta$ - actin: Control:  $0.11 \pm 0.0038$ ; Baicalin:  $0.11 \pm 0.0069$ ; HG:  $0.09 \pm 0.0058$ ; HG+Baicalin:  $0.12 \pm 0.0015$ .  $N > 3$ .

**Fig. 4:**

**F:** BVD(%): Control:  $20.61 \pm 7.0017\%$ ; Baicalin:  $22.69 \pm 5.3238\%$ ; HG:  $8.91 \pm 1.0489\%$ ; HG+Baicalin:  $16.85 \pm 3.8554\%$ . N=8 in each group.

**G:** VEGFR2/PPIA: Control:  $0.66 \pm 0.0893$ ; Baicalin:  $0.51 \pm 0.0607$ ; HG:  $0.36 \pm 0.1233$ ; HG+Baicalin:  $0.73 \pm 0.1369$ . N>3.

**Fig. 5:**

**A:** c-Caspase3/ $\beta$ -actin : Control:  $0.28 \pm 0.0011$ ; Baicalin:  $0.29 \pm 0.0179$ ; HG:  $0.33 \pm 0.0085$ ; HG+Baicalin:  $0.30 \pm 0.0045$ . N>3.

**B:** 6hour: Control:  $1.00 \pm 0.07$ ; Baicalin:  $1.04 \pm 0.09$ ; HG:  $0.93 \pm 0.13$ ; HG+Baicalin:  $0.94 \pm 0.04$ .

12hour: Control:  $1.00 \pm 0.06$ ; Baicalin:  $0.97 \pm 0.09$ ; HG:  $0.80 \pm 0.03$ ; HG+Baicalin:  $0.91 \pm 0.09$ .

24hour: Control:  $1.00 \pm 0.07$ ; Baicalin:  $1.01 \pm 0.10$ ; HG:  $0.71 \pm 0.06$ ; HG+Baicalin:  $0.88 \pm 0.04$ .

36hour: Control:  $1.00 \pm 0.02$ ; Baicalin:  $1.00 \pm 0.03$ ; HG:  $0.69 \pm 0.04$ ; HG+Baicalin:  $0.96 \pm 0.03$ .

48hour: Control:  $1.12 \pm 0.10$ ; Baicalin:  $1.21 \pm 0.06$ ; HG:  $0.51 \pm 0.02$ ; HG+Baicalin:  $1.18 \pm 0.03$ .

N>4 in each group.

**C1:** Apoptosis: Control:  $4.49 \pm 2.22\%$ ; Baicalin:  $6.57 \pm 2.50\%$ ; HG:  $13.69 \pm 2.83\%$ ; HG+Baicalin:  $9.63 \pm 3.13\%$ . N=3 in each group.

**I:** PI/Hochest: Control:  $3.36 \pm 1.6068\%$ ; Baicalin:  $2.39 \pm 0.7012\%$ ; HG:  $25.65 \pm 2.4128\%$ ; HG+Baicalin:  $3.12 \pm 0.5646\%$ . N=3 in each group.

**J:** Cell area: Control:  $0.36 \pm 0.12\text{mm}^2$ ; Baicalin:  $0.35 \pm 0.07\text{mm}^2$ ; HG:  $0.27 \pm 0.10\text{mm}^2$ ; HG+Baicalin:  $0.38 \pm 0.12\text{mm}^2$ . N >18 in each group.

**Fig. 6:**

**A:** ROS production (%): Control:  $76.60 \pm 6.12\%$ ; Baicalin:  $70.60 \pm 5.24\%$ ; HG:  $104.20 \pm 10.42\%$ ; HG+Baicalin:  $89.60 \pm 0.49\%$ . N=5 in each group.

**B1:** DHE intensity/DAPI intensity: Control:  $0.20 \pm 0.08$ ; Baicalin:  $0.24 \pm 0.14$ ; HG:  $0.44 \pm 0.14$ ; HG+Baicalin:  $0.21 \pm 0.09$ . N>6 in each group.

**C:** SOD: Control:  $9.27 \pm 1.70\text{U/mg}$ ; Baicalin:  $8.34 \pm 1.65\text{U/mg}$ ; HG:  $8.74 \pm 1.24\text{U/mg}$ ; HG+Baicalin:  $5.11 \pm 0.95\text{U/mg}$ . N=8 in each group.

**D:** MDA: Control:  $0.01 \pm 0.00\mu\text{mol/mg prot}$ ; Baicalin:  $0.01 \pm 0.00\mu\text{mol/mg prot}$ ; HG:  $0.18 \pm 0.00\mu\text{mol/mg prot}$ ; HG+Baicalin:  $0.15 \pm 0.00\mu\text{mol/mg prot}$ . N=3 in each group.

**G:** Mortality: Control: 0%; Baicalin: 0%; AAPH: 32%; AAPH +Baicalin:16%. N=30 embryos in each group.

**H1:** YSM BVD(%): Control:  $56.14 \pm 7.3379\%$ ; Baicalin:  $60.99 \pm 11.6163\%$ ; AAPH:  $45.51 \pm 4.8439\%$ ; AAPH +Baicalin:  $71.57 \pm 7.9248\%$ . N>7 in each group.

**Fig. 7:**

**A1:** LC3II/LC3I: A: Control:  $0.06 \pm 0.0007$ ; Baicalin:  $0.07 \pm 0.0101$ ; HG:  $0.09 \pm 0.0087$ ; HG+Baicalin:  $0.08 \pm 0.0090$ . N=3 in each group.

Beclin1/ $\beta$ -actin: A: Control:  $0.12 \pm 0.0059$ ; Baicalin:  $0.15 \pm 0.0235$ ; HG:  $0.19 \pm 0.0545$ ; HG+Baicalin:  $0.13 \pm 0.0362$ . N=3 in each group.

P62/ $\beta$ -actin: A: Control:  $0.88 \pm 0.0851$ ; Baicalin:  $0.85 \pm 0.0234$ ; HG:  $1.02 \pm 0.0302$ ; HG+Baicalin:  $0.85 \pm 0.0194$ . N=3 in each group.

**E:** Control: 0%; Baicalin: 0%; RAPA: 28%; RAPA+Baicalin: 12%; N=25 embryos in each group.

**Fig. 8:**

**F:** PI/Hochest(%): Control:  $2.7 \pm 2.271\%$ ; HG:  $16.3 \pm 5.510\%$ ; HG+Baicalin:  $4.2 \pm 2.920\%$ ; HG+CQ:  $25.6 \pm 2.767\%$ ; HG+VC:  $3.8 \pm 21.89\%$ . N=3 in each group.

**L:** Apoptosis (%): Control:  $2.64 \pm 0.0927\%$ ; HG:  $10.96 \pm 1.6853\%$ ; HG+Baicalin:  $4.24 \pm 1.1853\%$ ; HG+CQ:  $11.04 \pm 3.4237\%$ ; HG+VC:  $5.41 \pm 0.6316\%$ . N=3 in each group.

**Fig. 9:**

**B:** Control: week 1:  $4.77 \pm 0.27\text{mM}$ ; week 2:  $4.75 \pm 1.60\text{mM}$ ; week 3:  $4.38 \pm 0.64\text{mM}$ ; week 4:  $5.40 \pm 0.74\text{mM}$ ; week 5:  $5.85 \pm 0.41\text{mM}$ . N=6.

Diabetes Melitus: week 1:  $5.20 \pm 0.66\text{mM}$ ; week 2:  $20.38 \pm 2.82\text{mM}$ ; week 3:  $25.67 \pm 3.45\text{mM}$ ; week 4:  $23.45 \pm 2.94\text{mM}$ ; week 5:  $22.65 \pm 3.07\text{mM}$ . N=11.

Diabetes Melitus+Baicalin: week 1:  $5.30 \pm 0.61$ mM; week 2:  $19.23 \pm 2.39$  mM;  
week 3:  $20.54 \pm 2.54$ mM; week 4:  $21.88 \pm 3.29$ mM; week 5:  $20.28 \pm 3.53$ mM.  
N=12.

**D:** The number of glomerular sclerosis: Control:  $19.00 \pm 6.8069$ ; Diabetes Melitus:  $36.67 \pm 5.2175$ ; Diabetes Melitus+Baicalin:  $23.17 \pm 5.7276$ . N=6 in each group.

**E:** Mesangial area (% of glomerular area): Control:  $12.79 \pm 3.42\%$ ; Diabetes Melitus:  $32.02 \pm 2.48\%$ ; Diabetes Melitus+Baicalin:  $23.92 \pm 3.82\%$ . N>5 in each group.

### **Supplementary Fig. 2.**

**B:** Control:  $1.5 \pm 0.11$ g; Baicalin:  $1.70 \pm 0.23$ g; HG:  $1.47 \pm 0.18$ g; HG+Baicalin:  $1.89 \pm 0.24$ g. N>10 embryos in each group.

**G:** BVD(%): A: Control:  $9.35 \pm 1.1149\%$ ; Baicalin:  $9.23 \pm 1.5669\%$ ; HG:  $7.58 \pm 1.3476\%$ ; HG+Baicalin:  $9.32 \pm 2.1318\%$ . N>8 embryos in each group.
